# Supplementary material for: Glowing stereocomplex biopolymers are generating power: polylactide/carbon quantum dot hybrid nanofibers with high piezoresponse and multicolor luminescence
Source: Royal Society of Chemistry journal article supplement (doi:10.1039/c8ta08593e), 2018-12-13
Supplement: c8ta08593e1.pdf [file c8ta08593e1.pdf]

## Supporting Information

### **Glowing stereocomplex biopolymers are generating power: a polylactide/carbon quantum dot hybrid nanofiber with high piezoresponse and multicolor luminescence**

Yali Xu <sup>a, †</sup>, Long Jin <sup>a, †</sup>, Xuebing He <sup>a</sup>, Xi Huang <sup>a</sup>, Meilin Xie <sup>a</sup>, Chuanfeng Wang <sup>a</sup>,  
Chaoliang Zhang <sup>c</sup>, Weiqing Yang <sup>a, \*\*</sup>, Fanbin Meng <sup>a, \*\*\*</sup>, Jun Lu <sup>a, b, #, \*</sup>

<sup>a</sup> Key Laboratory of Advanced Technologies of Materials, Ministry of Education, School of Materials Science and Engineering, Southwest Jiaotong University, Chengdu 610031, Sichuan, China

<sup>b</sup> State Key Laboratory of Polymer Materials Engineering, Sichuan University, Chengdu 610065, Sichuan, China

<sup>c</sup> State Key Laboratory of Oral Diseases, West China Hospital of Stomatology, Sichuan University, Chengdu 610041, Sichuan, China

---

<sup>†</sup> These authors equally contributed to this work.

<sup>#</sup> Other used names Jun Lv and Jun Lyu.

<sup>\*</sup> Corresponding author.

<sup>\*\*</sup> Corresponding author.

<sup>\*\*\*</sup> Corresponding author.

E-mail address: [junluprc@hotmail.com](mailto:junluprc@hotmail.com) (J. Lu), [wqyang@swjtu.edu.cn](mailto:wqyang@swjtu.edu.cn) (W.Q. Yang), [mengfanbin\\_wing@126.com](mailto:mengfanbin_wing@126.com) (F.B. Meng).

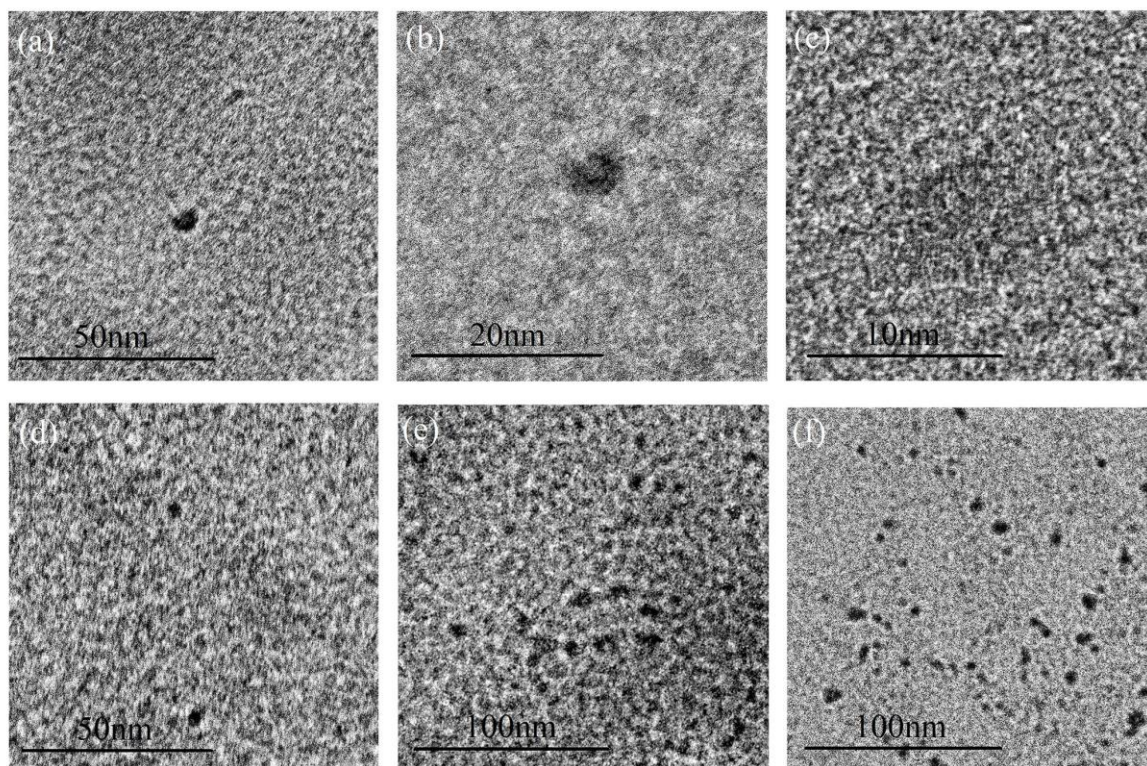

**Fig. S1.** Typical TEM photographs of the CQDs in a dilute solution (a-d), showing the size and morphologies of the original CQDs, and the representative TEM images of the as fabricated PDLA/PLLA/CQDs composites with 1 wt.-% (b) and 2 wt.-% (c) CQDs concentrations, respectively, suggesting the CQDs intrinsically tend to aggregate within nanoscale in the polymer matrix, and the size of the CQDs aggregates increased with the increase of CQDs loadings.

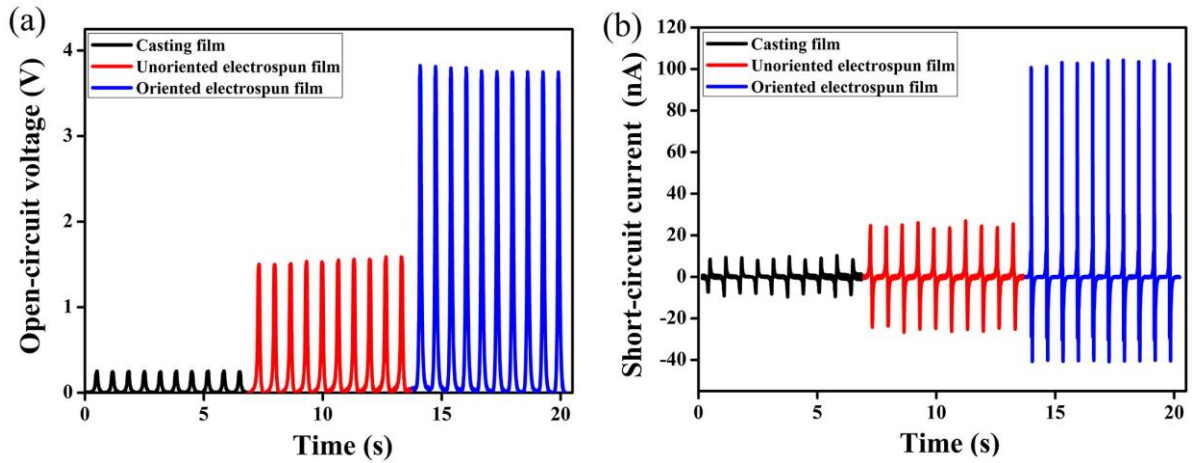

**Fig. S2.** Open-circuit voltage (a) and short-circuit current (b) of the PDLA<sub>49.5</sub>/PLLA<sub>49.5</sub>/CQD<sub>1</sub> based solution casting film, unoriented electrospun nanofiber film and oriented electrospun nanofibrous film, generated at a stimulated frequency of 1.5 Hz and applied force of 10 N. Each sample has a 7-layer stack, with the size of 2 cm×2 cm. Other process being the same, the rotating speed of the receiving drum was 0 and 1400 r/min, respectively, during the fabrication of the unoriented and oriented electrospun nanofibrous films.

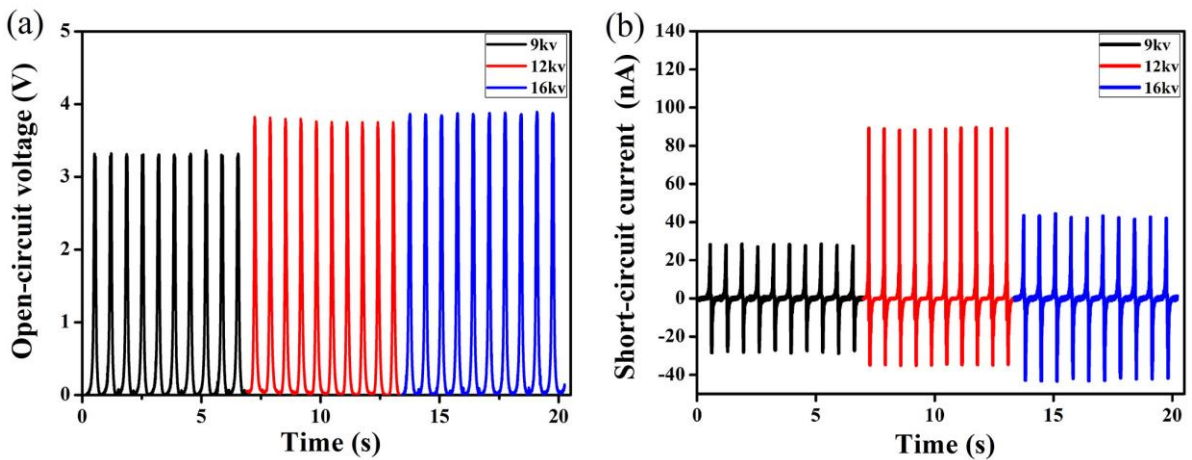

**Fig. S3.** Open-circuit voltage (a) and short-circuit current (b) of the electrospun PDLA<sub>49.5</sub>/PLLA<sub>49.5</sub>/CQD<sub>1</sub> nanofibrous films obtained at different spinning voltages, generated at a stimulated frequency of 1.5 Hz and applied force of 10 N. Each sample has a 7-layer stack, with the size of 2 cm×2 cm.

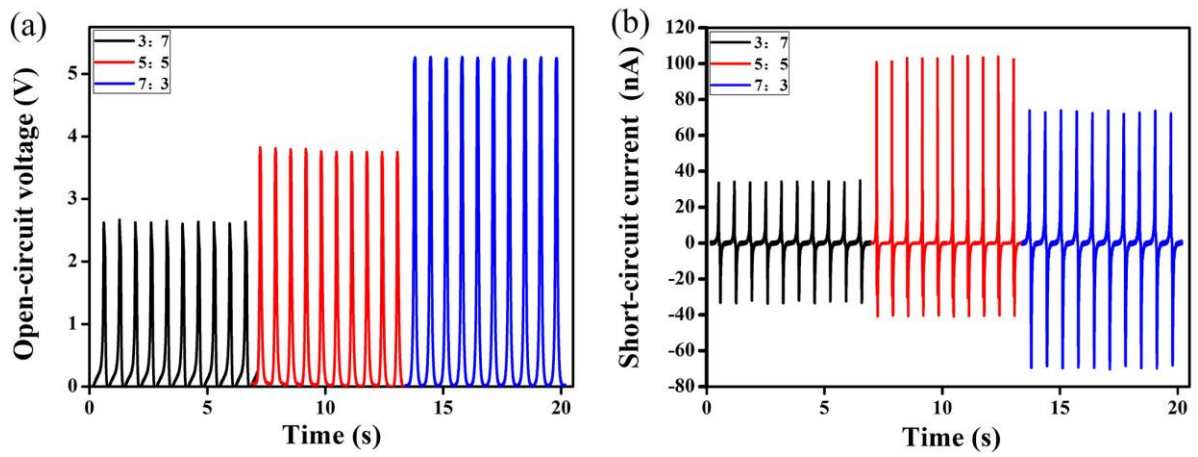

**Fig. S4.** Open-circuit voltage (a) and short-circuit current (b) of the electrospun PDLA<sub>x</sub>/PLLA<sub>y</sub>/CQD<sub>1</sub> nanofibrous films with various x/y ratios, generated at a stimulated frequency of 1.5 Hz and applied force of 10 N. Each sample has a 7-layer stack, with the size of 2 cm×2 cm.
